# Supplementary material for: Synthesis and Evaluation of New Coumarin Derivatives as Antioxidant, Antimicrobial, and Anti-Inflammatory Agents
Source: PubMed Central journal article supplement (PMC7397269; doi:10.3390/molecules25143251), 2020-07-16
Supplement: molecules-25-03251-s001.pdf [file molecules-25-03251-s001.pdf]

*Supplimentary Material*

## **Synthesis and evaluation of new coumarin derivatives as antioxidant, antimicrobial, and anti-inflammatory agents**

**Hanan M. Alshibl** <sup>1,\*</sup>, **Ebtehal S. Al-Abdullah** <sup>1</sup>, **Mogedda E. Haiba** <sup>1,2</sup>, **Hamad M. Alkahtani** <sup>1</sup>, **Ghada E.A. Awad** <sup>3</sup>, **Ahlam H. Mahmoud** <sup>4</sup>, **Bassant M.M. Ibrahim** <sup>5</sup>, **Ahmed Bari** <sup>1</sup>, **Alexander Villinger** <sup>6</sup>

<sup>1</sup> Department of Pharmaceutical Chemistry, College of Pharmacy, King Saud University, Riyadh 11451, Saudi Arabia; halshibl@ksu.edu.sa (H.M.A.S.); ealabdullah@ksu.edu.sa (E.S.A.A.) ; mogedda.haiba@yahoo.com (M.E.H.); ahamad@ksu.edu.sa (H.M.A.K.); abari@ksu.edu.sa (A.B.)

<sup>2</sup> Department of Medicinal Chemistry, National Research Centre, Cairo 12622, Egypt

<sup>3</sup> Chemistry of Natural and Microbial Product Department, National Research Centre, Cairo 12622, Egypt; ghadaawadnrc@gmail.com

<sup>4</sup> Department of Therapeutic Chemistry, Pharmaceutical and Drug Industries Research Division, National Research Centre, Dokki, Cairo 12622, Egypt; ahlam@hotmail.co.uk

<sup>5</sup> Pharmacology Department, Medical Research Division, National Research Centre, Cairo 12622, Egypt; bmmih1974@gmail.com

<sup>6</sup> Institut für Chemie, Abteilung Anorganische Chemie, Universität Rostock, Albert-Einstein-Str. 3a, 18059 Rostock, Germany; alexander.villinger@uni-rostock.de

\* Correspondence: [Halshibl@ksu.edu.sa](mailto:Halshibl@ksu.edu.sa) ; Tel.: +966-11805-2756.

Contents:

- 1- NMR spectra of compounds (**2a**, **4a**, **5c**, **6b**, **8e**, **9f**)
- 2- X-ray Crystallographic data of Compound **2a**

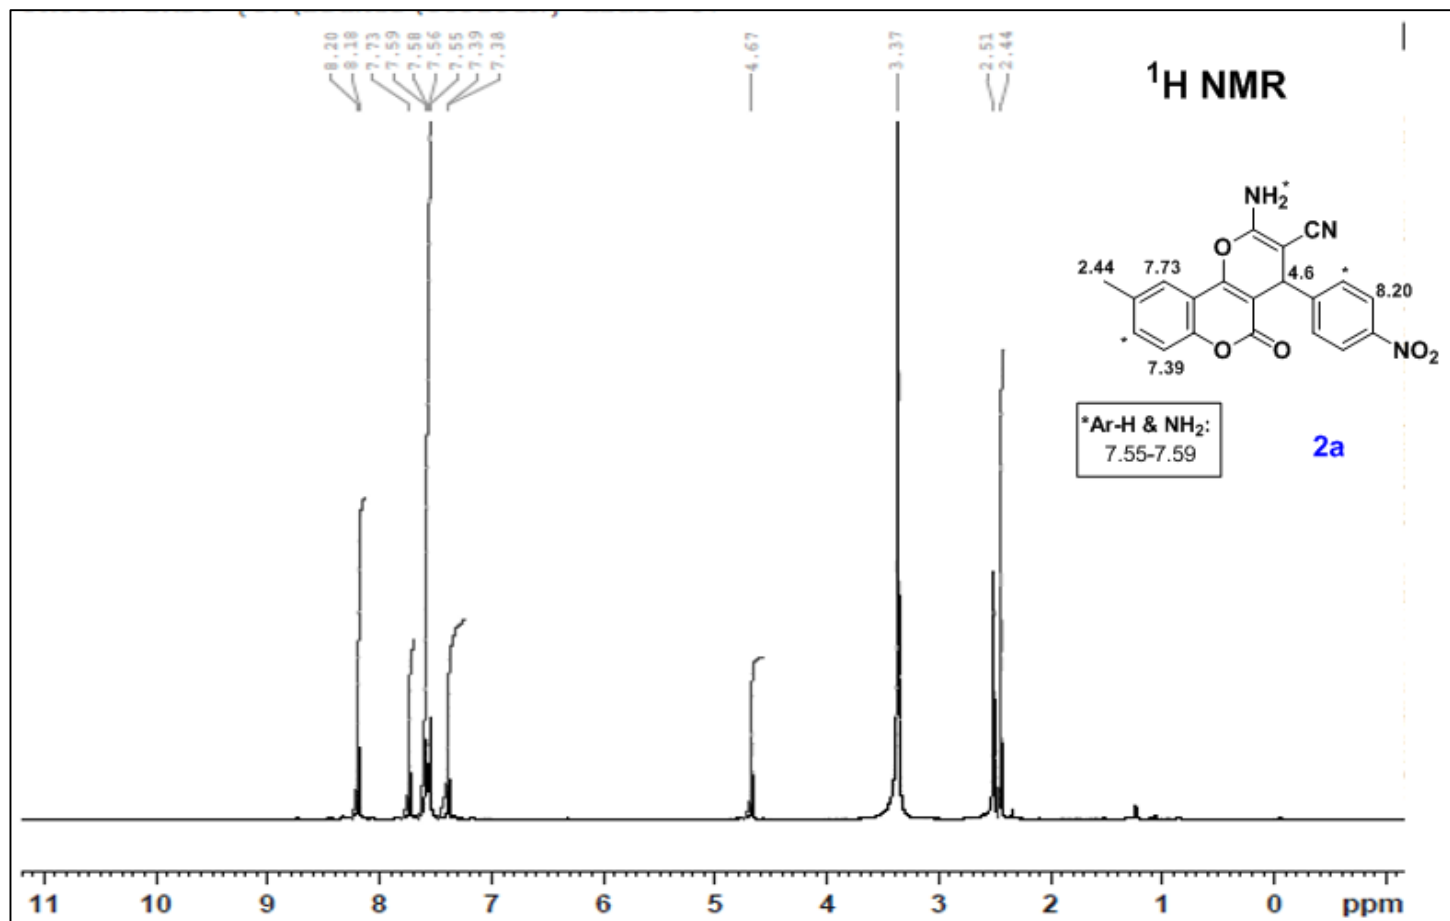

Figure S1: <sup>1</sup>H-NMR spectrum of compound **2a** in DMSO-d<sub>6</sub> (700 MHz).

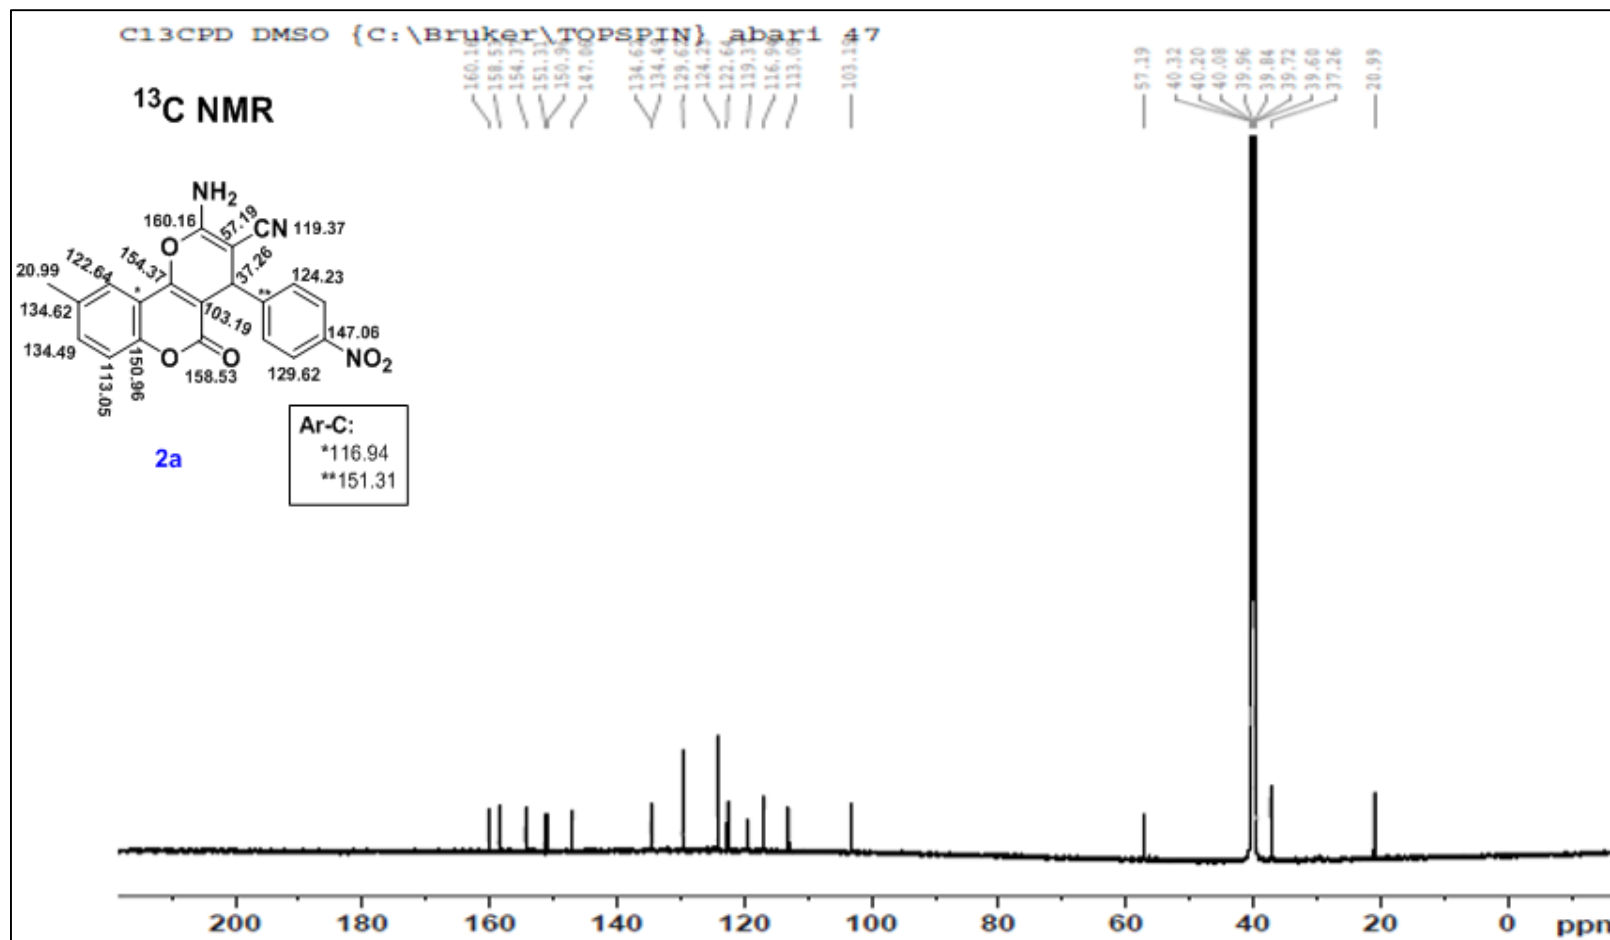

Figure S2: <sup>13</sup>C-NMR spectrum of compound **2a** in DMSO-d<sub>6</sub> (176 MHz).

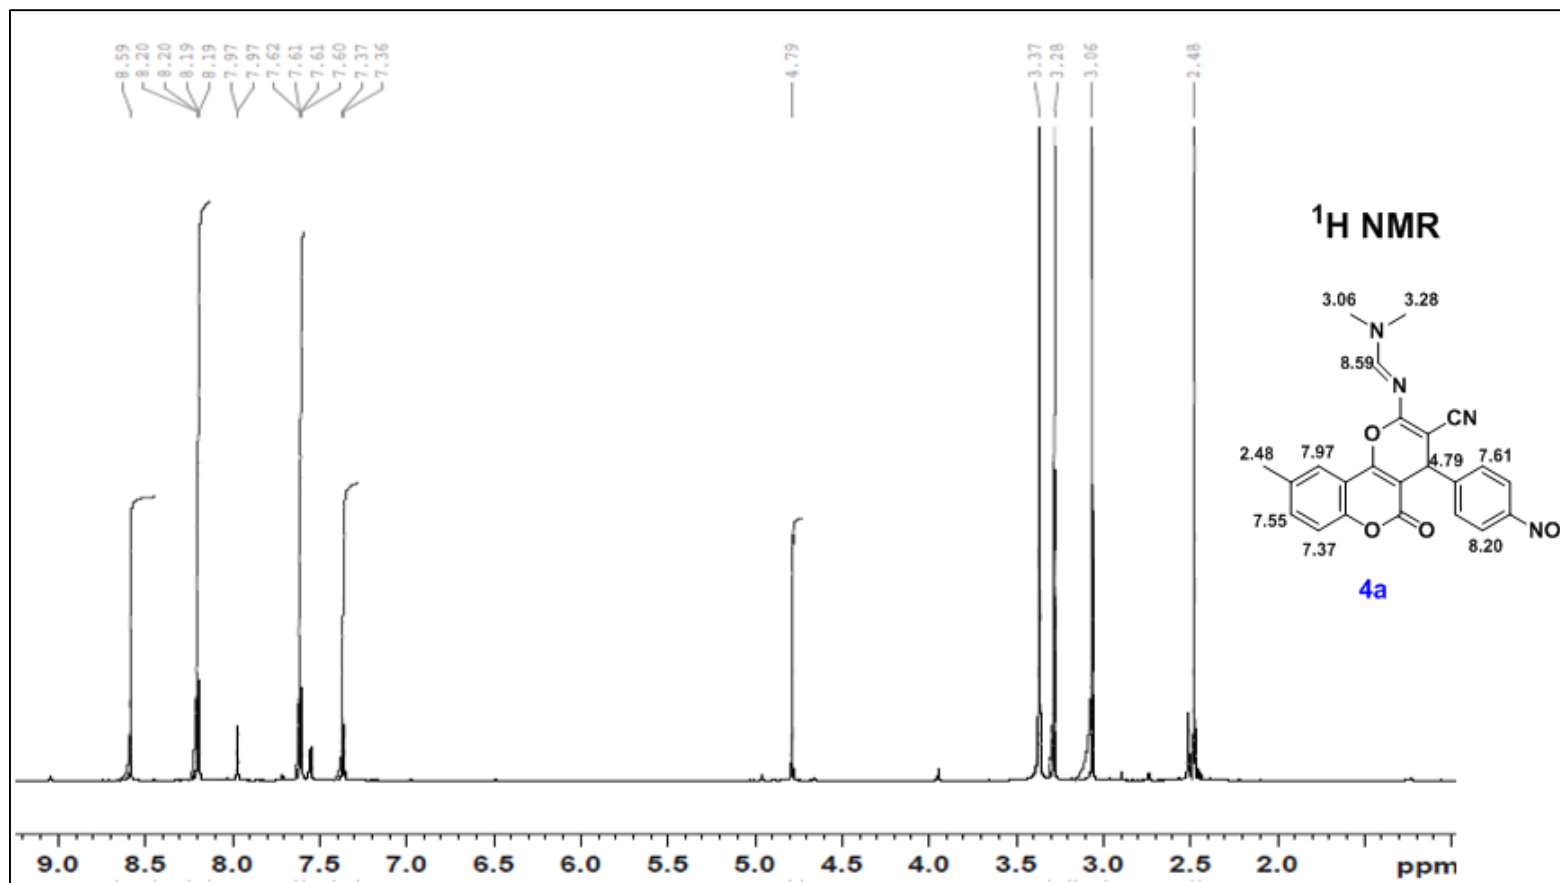

Figure S3: <sup>1</sup>H-NMR spectrum of compound **4a** in DMSO-d<sub>6</sub> (700 MHz).

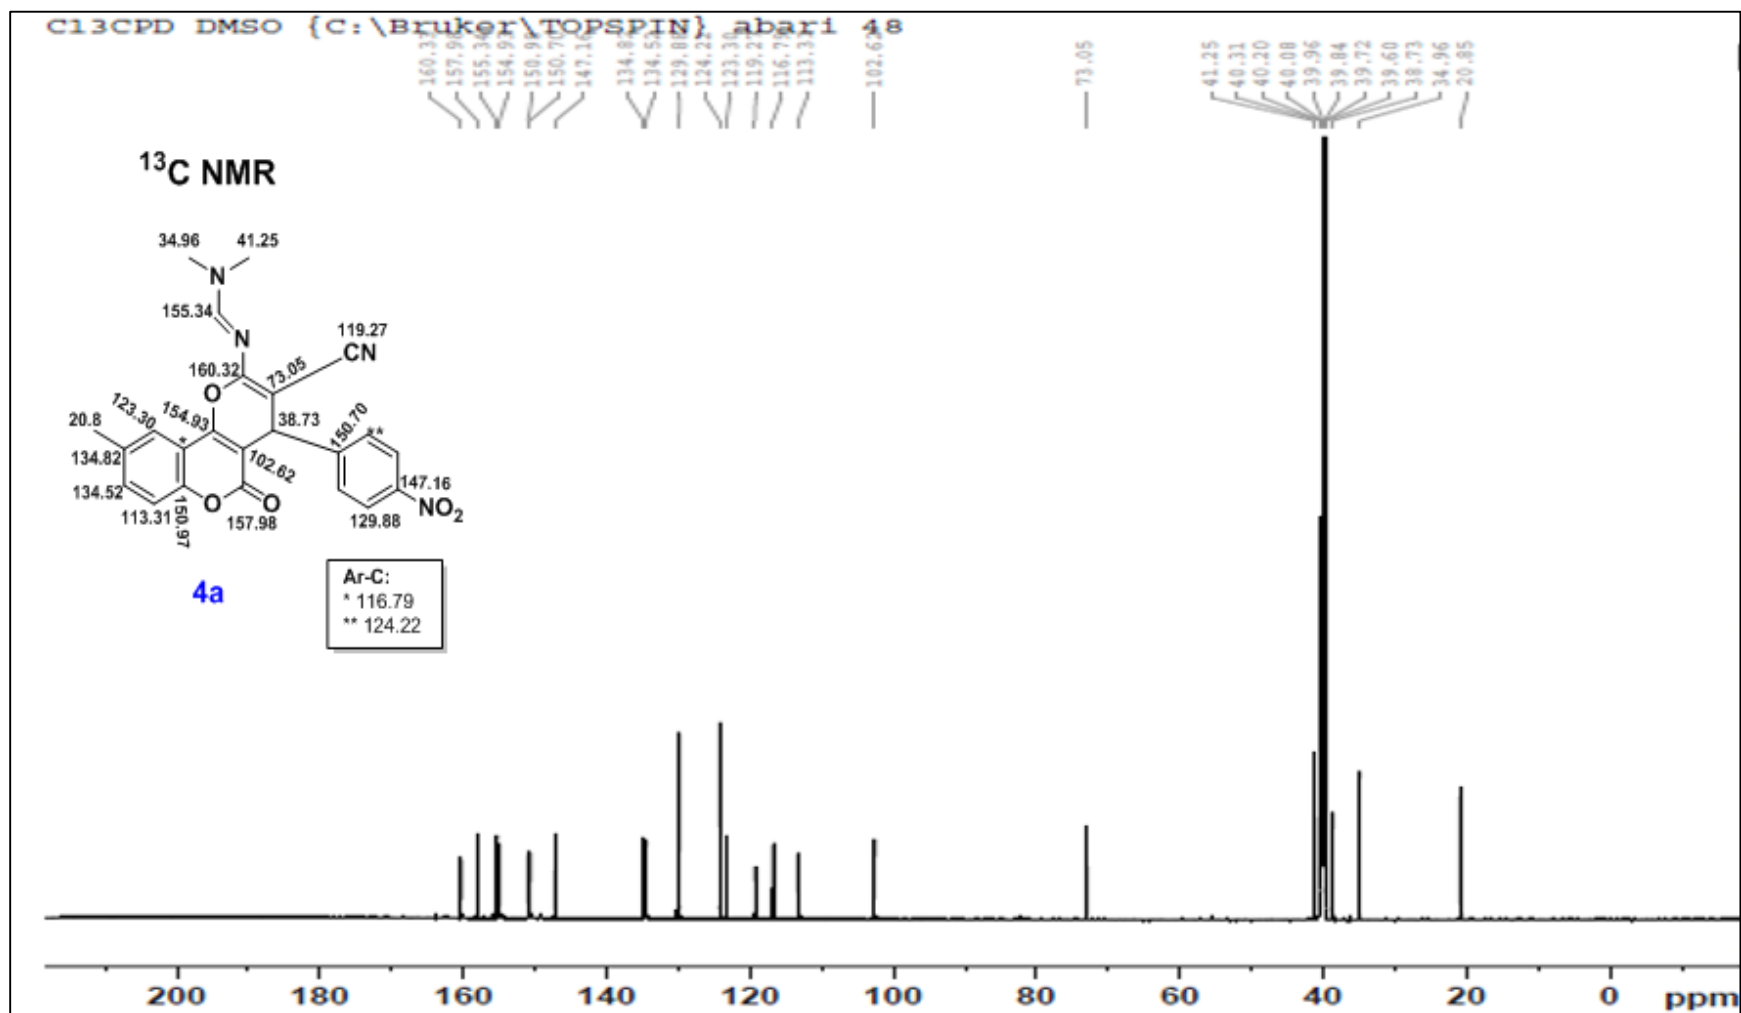

Figure S4: <sup>13</sup>C-NMR spectrum of compound **4a** in DMSO-d<sub>6</sub> (176 MHz).

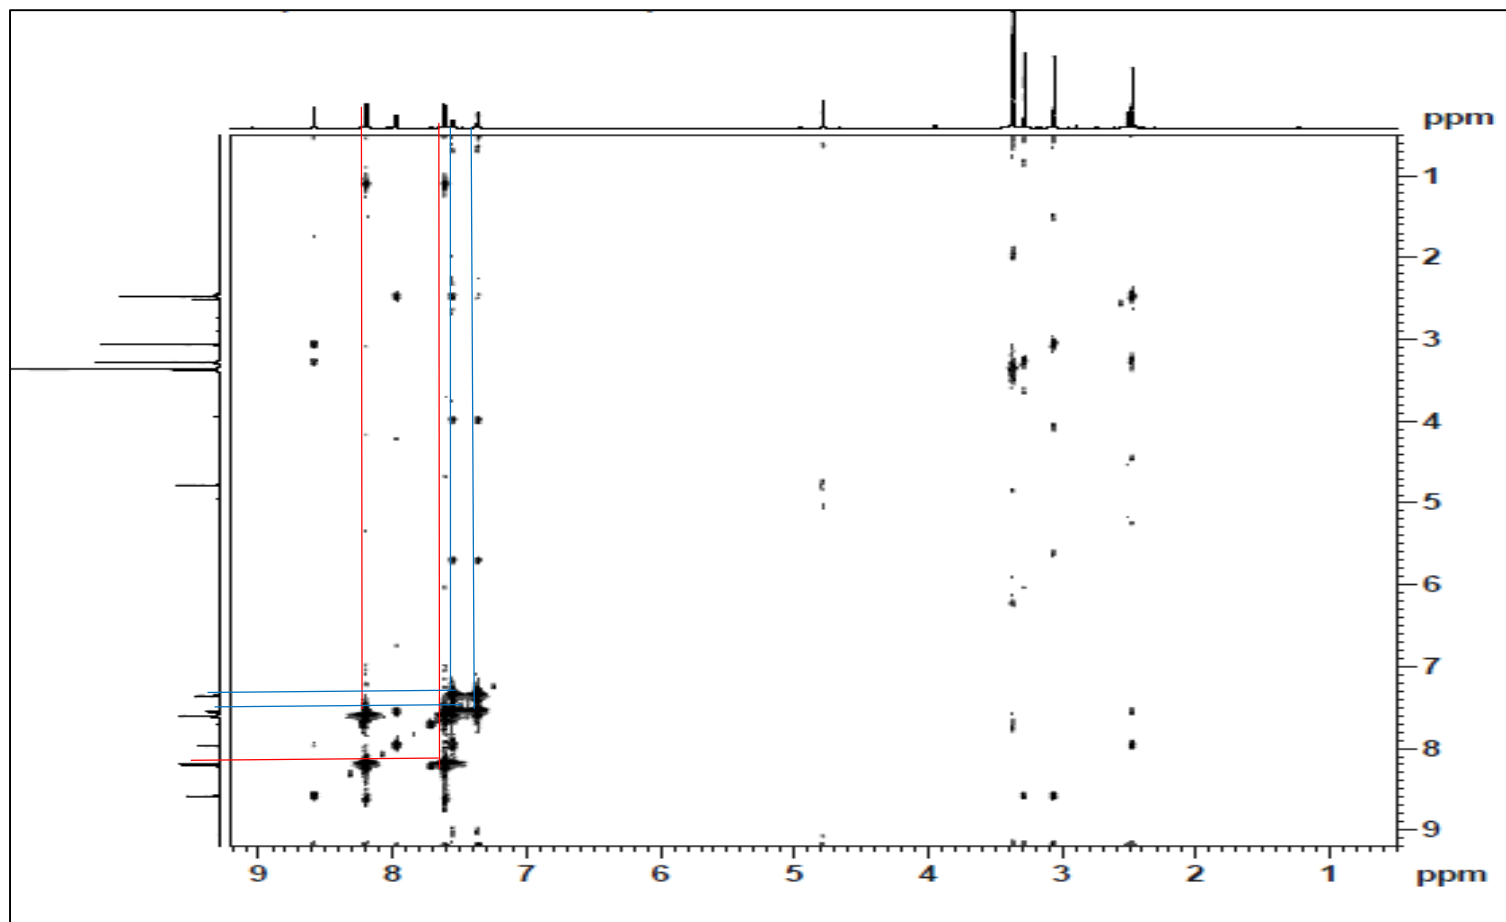

**Figure S5:**  $^1\text{H}$ - $^1\text{H}$ -Homomuclear COSY NMR spectrum of compound **4a** in  $\text{DMSO-d}_6$  (700 MHz).

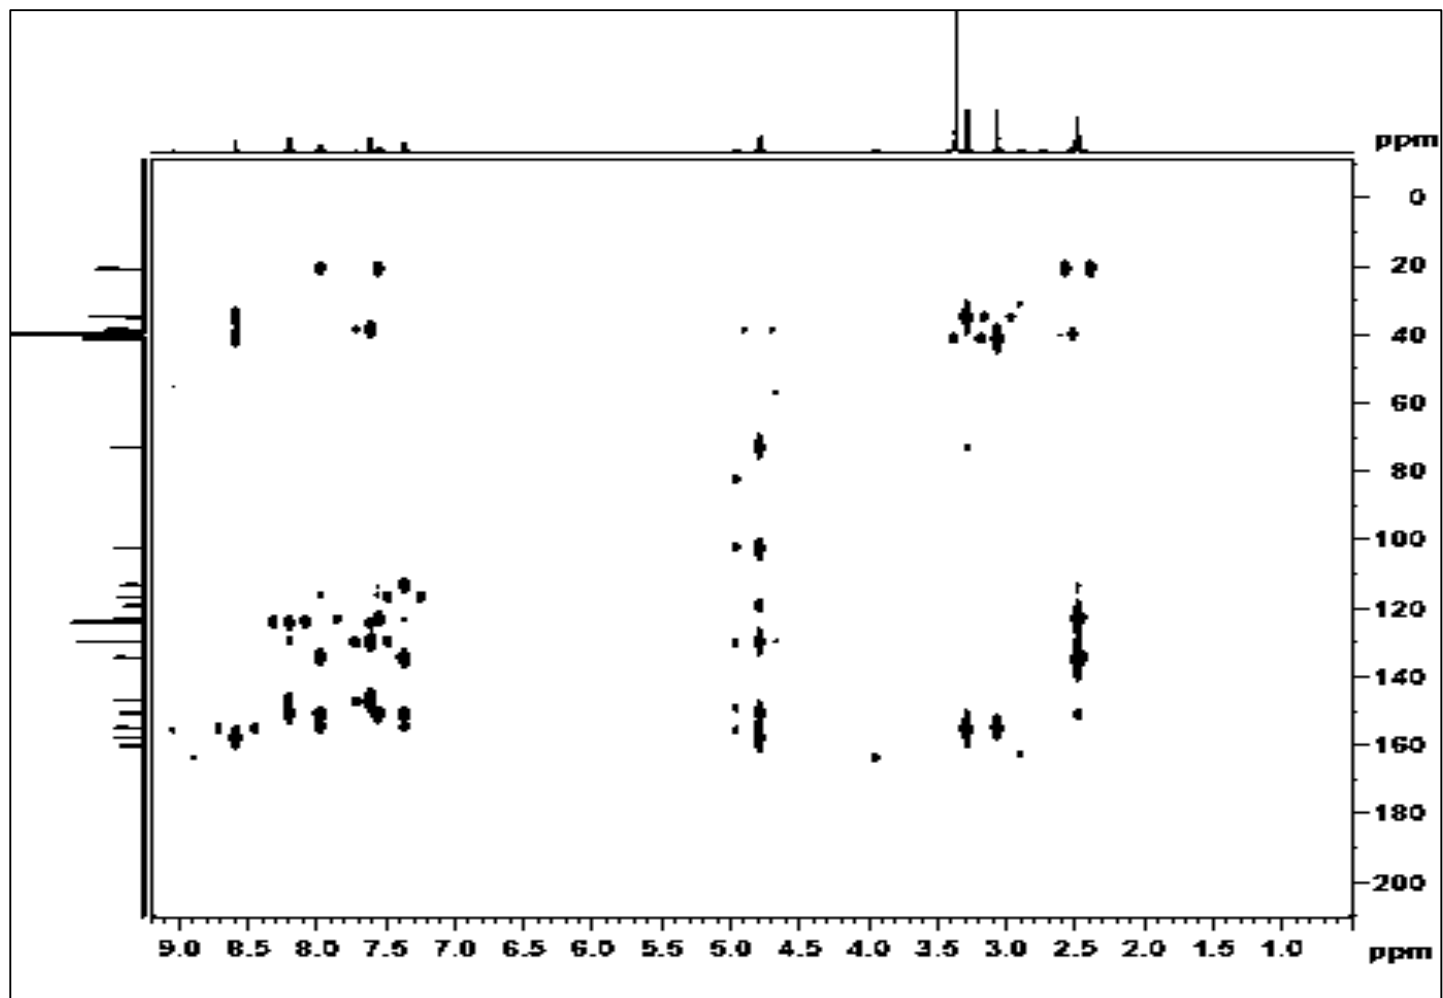

Figure S6:  $^1\text{H}$ - $^{13}\text{C}$ -Heteronuclear COSY (HMBC) NMR spectrum of compound **4a** in DMSO- $d_6$  (700/176 MHz).

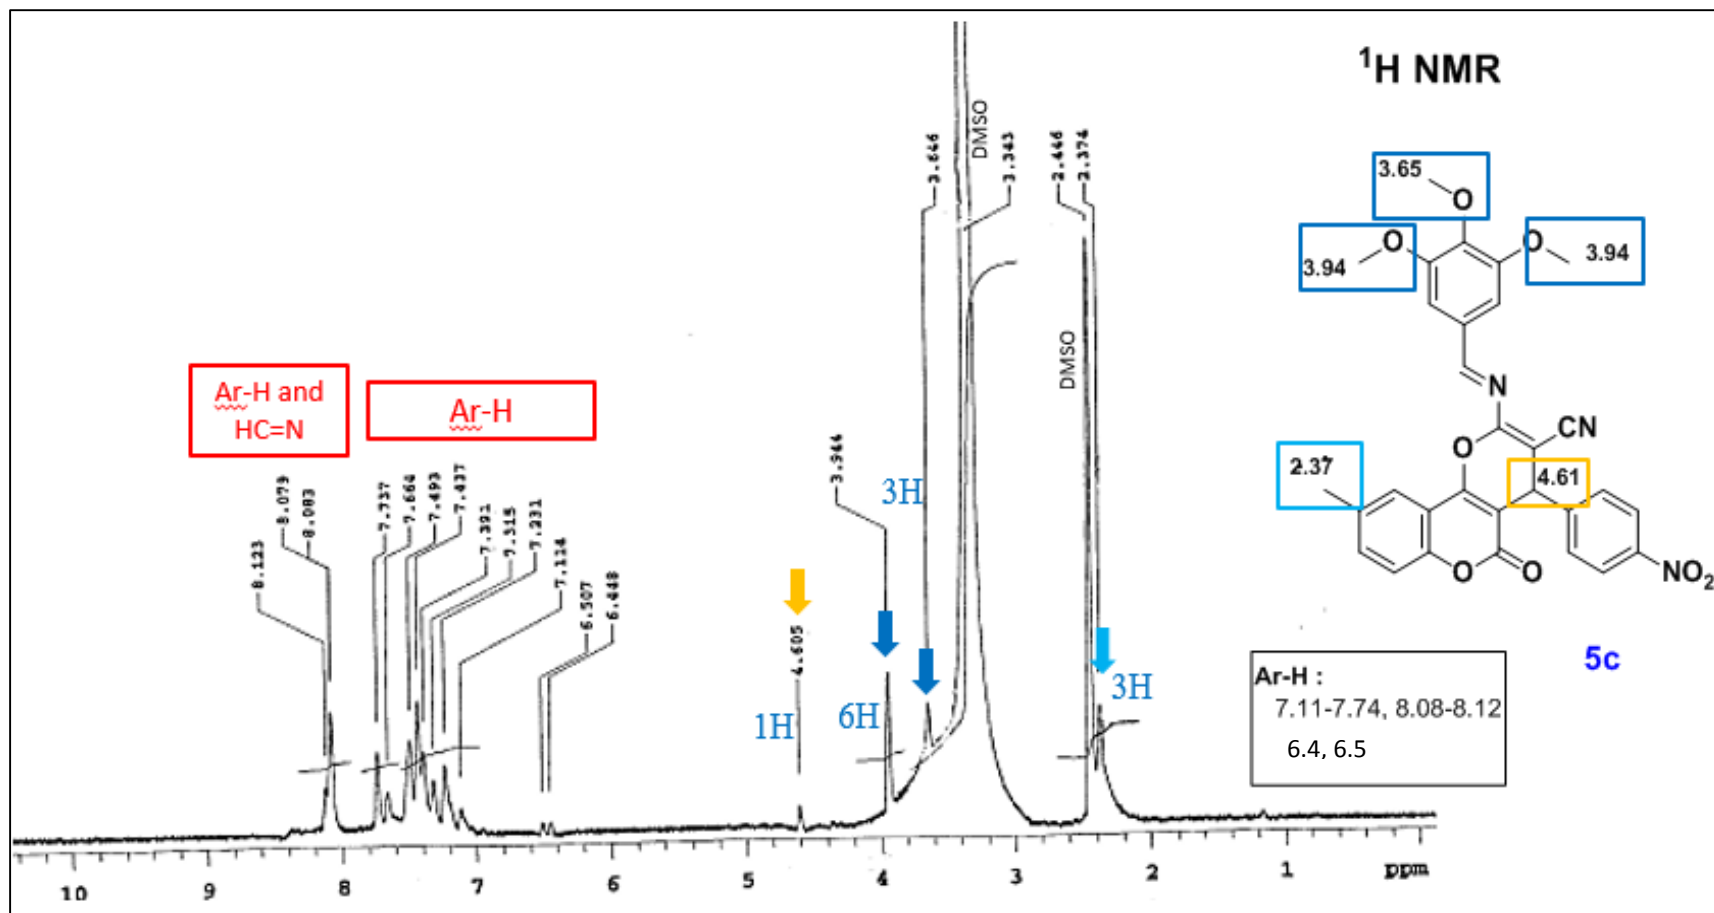

Figure S7: <sup>1</sup>H-NMR spectrum of compound **5c** in DMSO-d<sub>6</sub> (600 MHz).



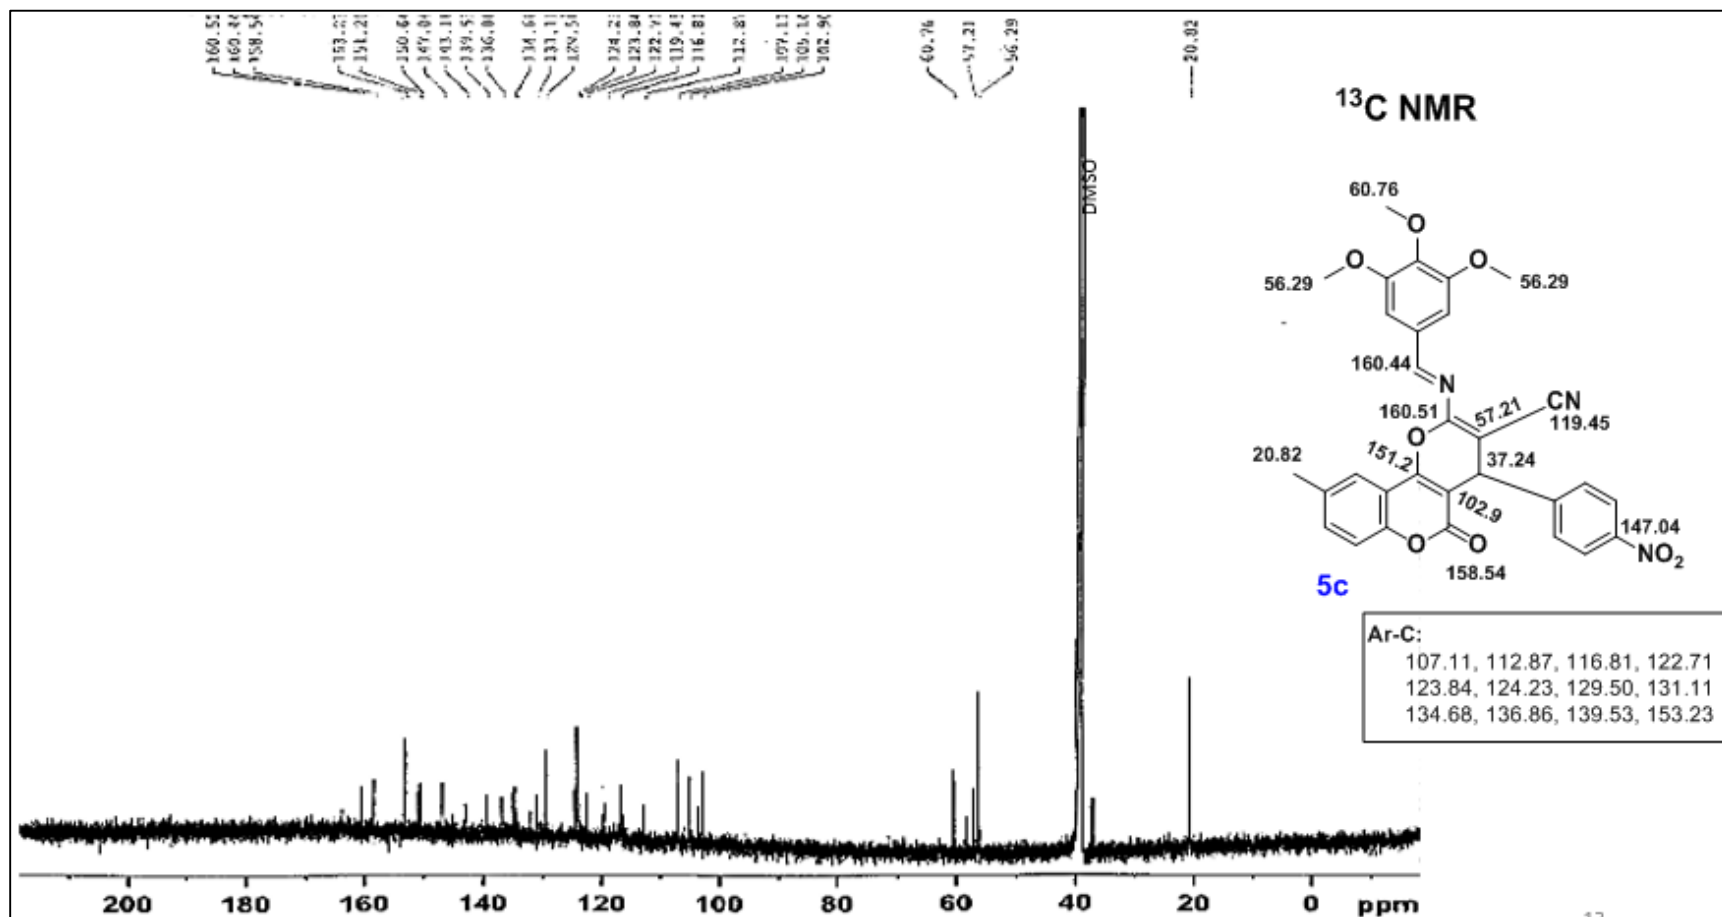

Figure S8: <sup>13</sup>C-NMR spectrum of compound **5c** in DMSO-d<sub>6</sub> (176 MHz).

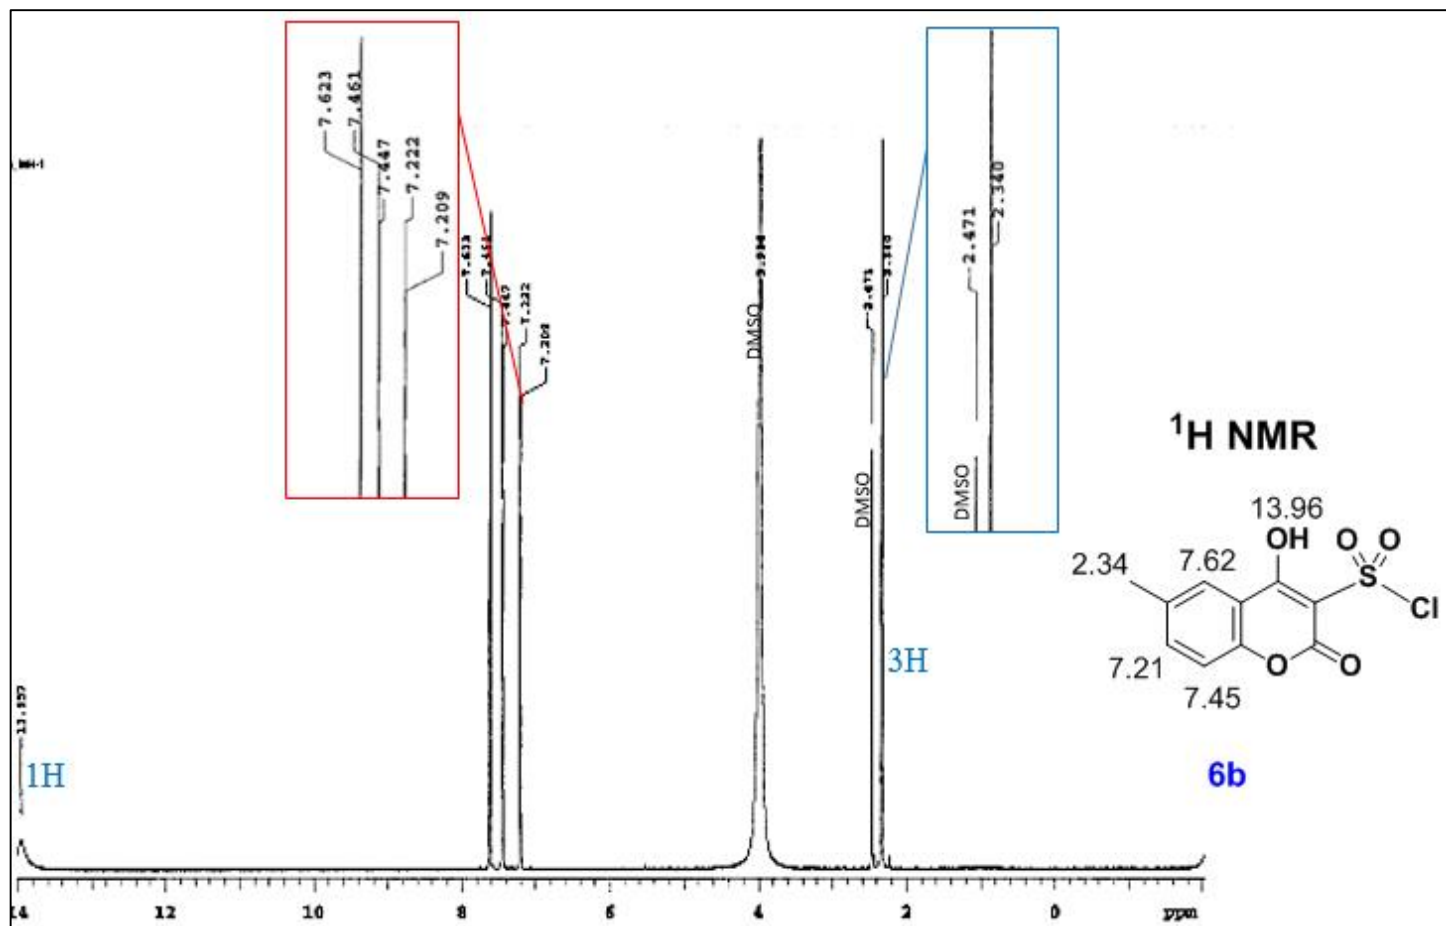

Figure S9: <sup>1</sup>H-NMR spectrum of compound **6b** in DMSO-d<sub>6</sub> (600 MHz).

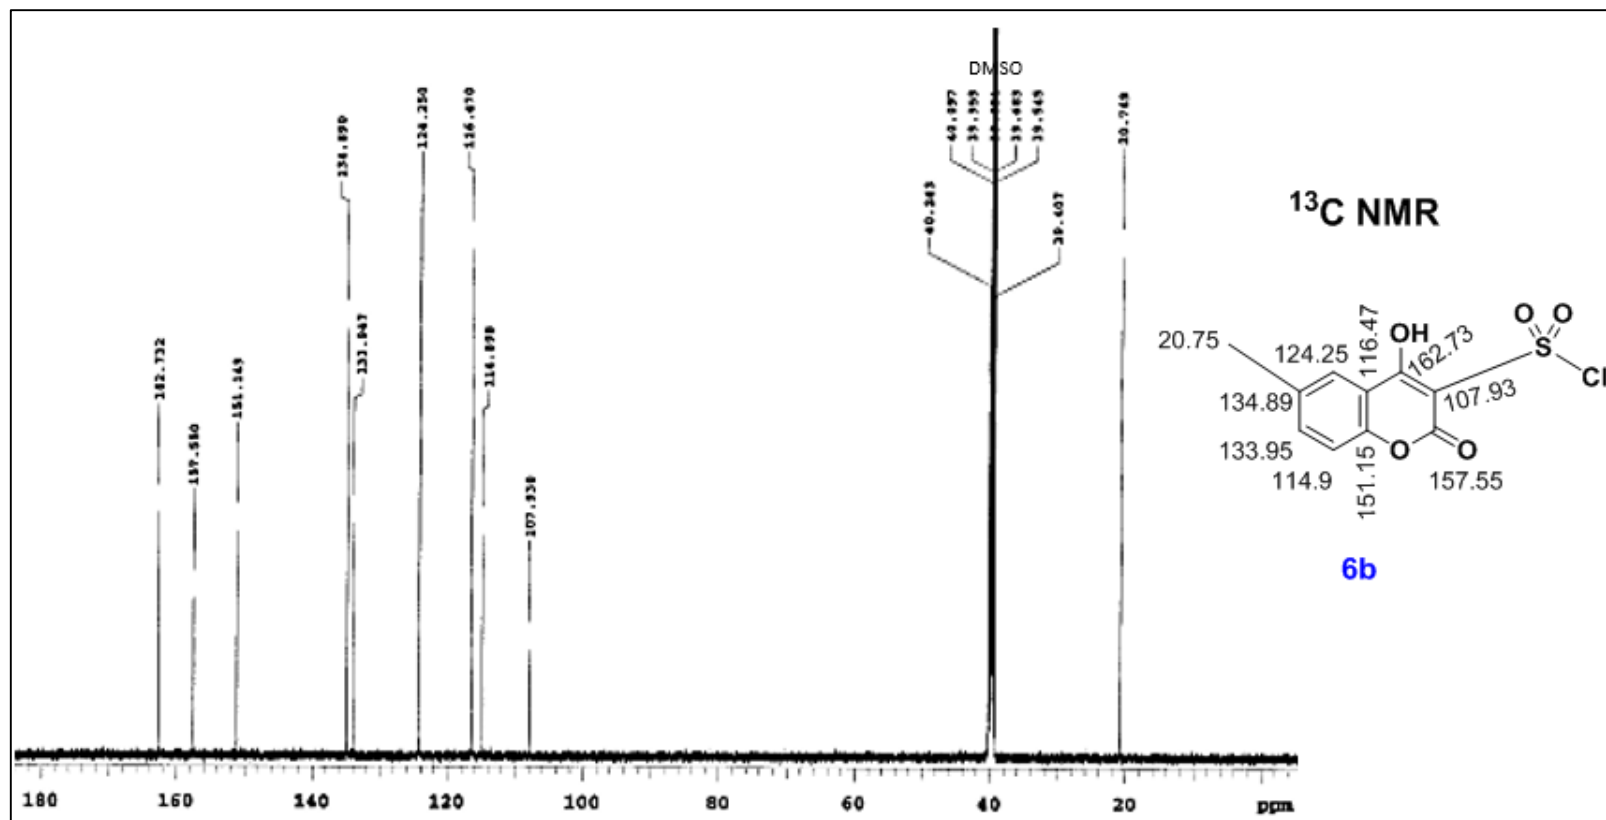

Figure S10a: <sup>13</sup>C-NMR spectrum of compound **6b** in DMSO-d<sub>6</sub> (154 MHz).

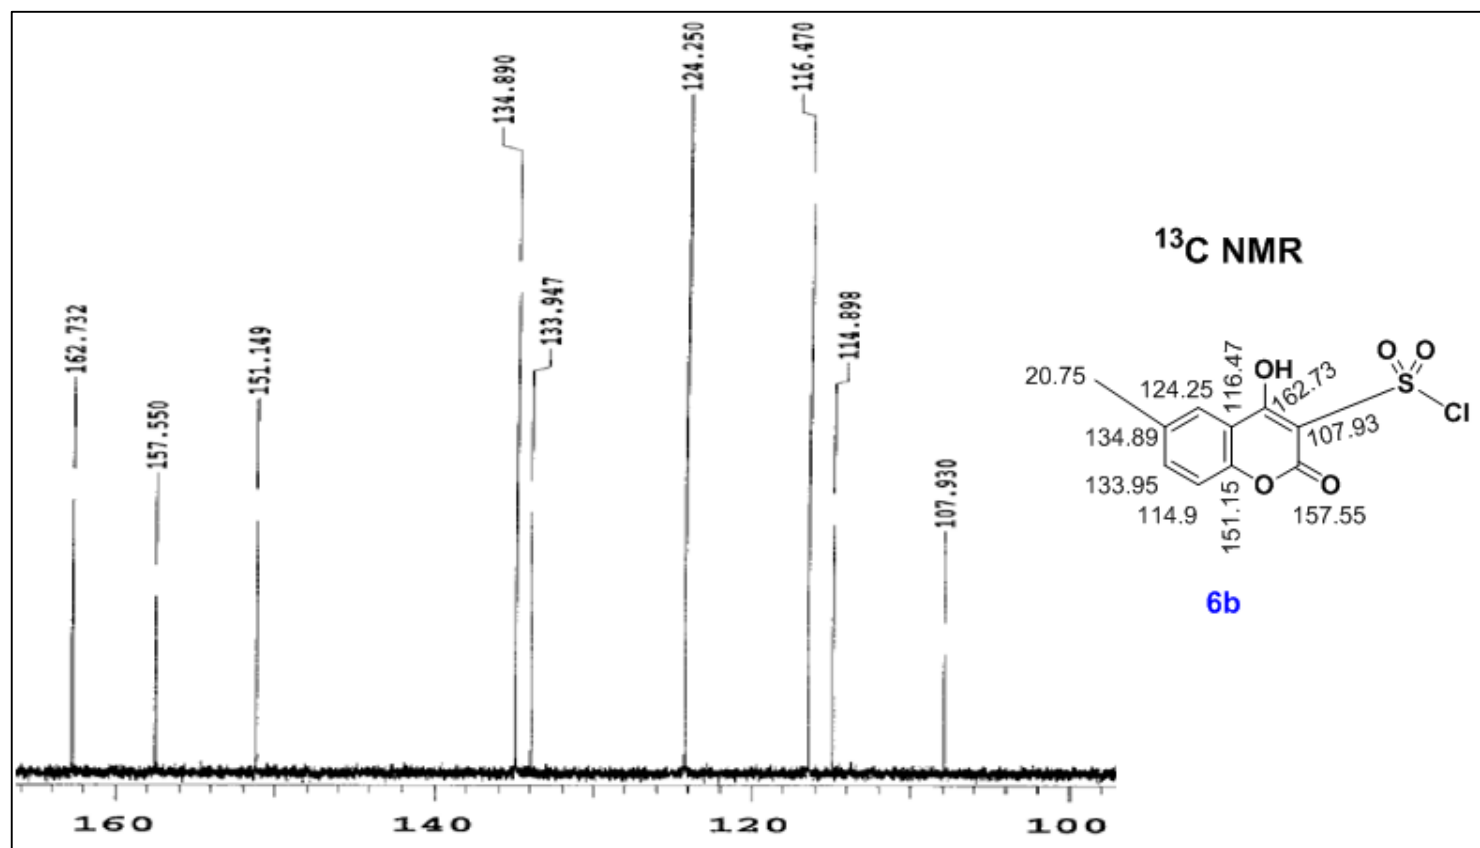

Figure S10b: <sup>13</sup>C-NMR spectrum of compound **6b** in DMSO-d<sub>6</sub> (154 MHz).

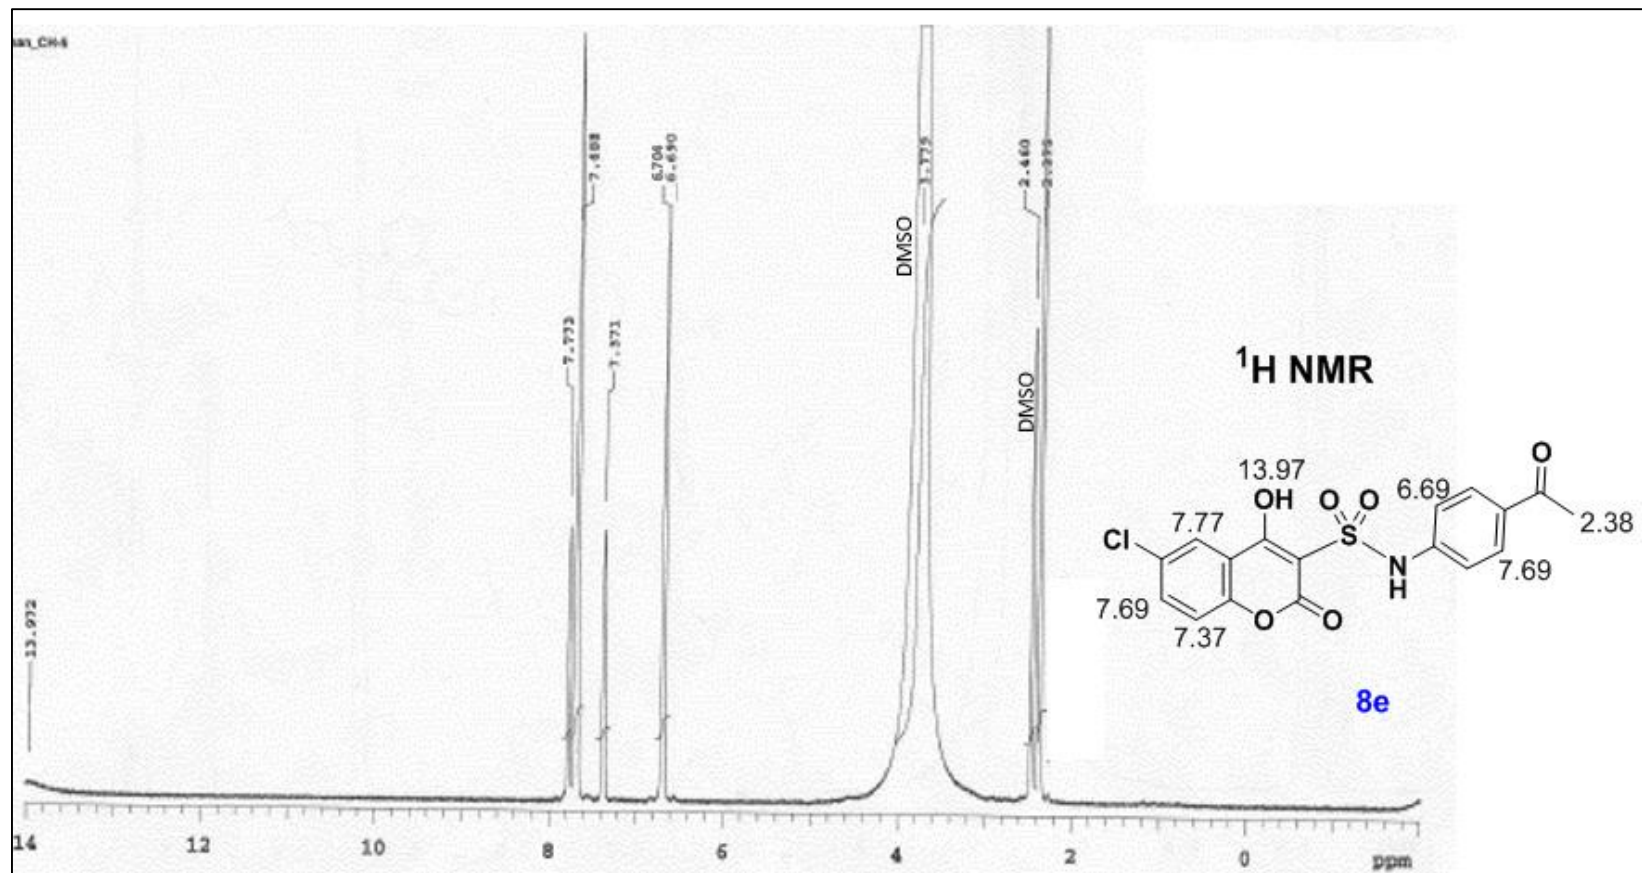

Figure S11: <sup>1</sup>H-NMR spectrum of compound **8e** in DMSO-d<sub>6</sub> (600 MHz).

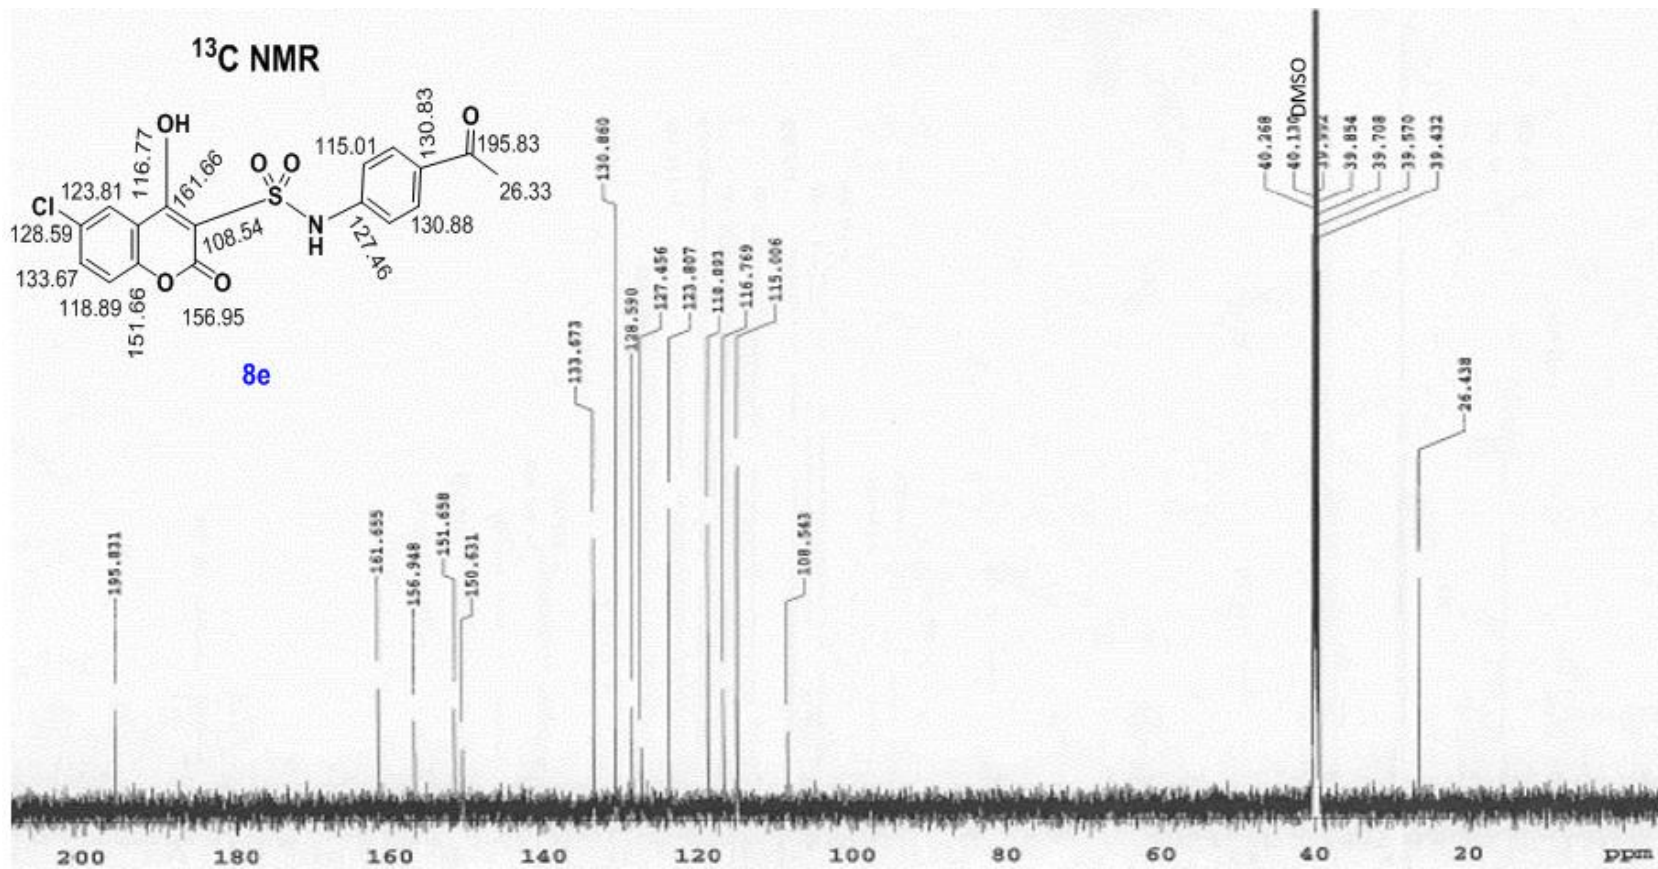

Figure S12: <sup>13</sup>C-NMR spectrum of compound **8e** in DMSO-d<sub>6</sub> (154 MHz).

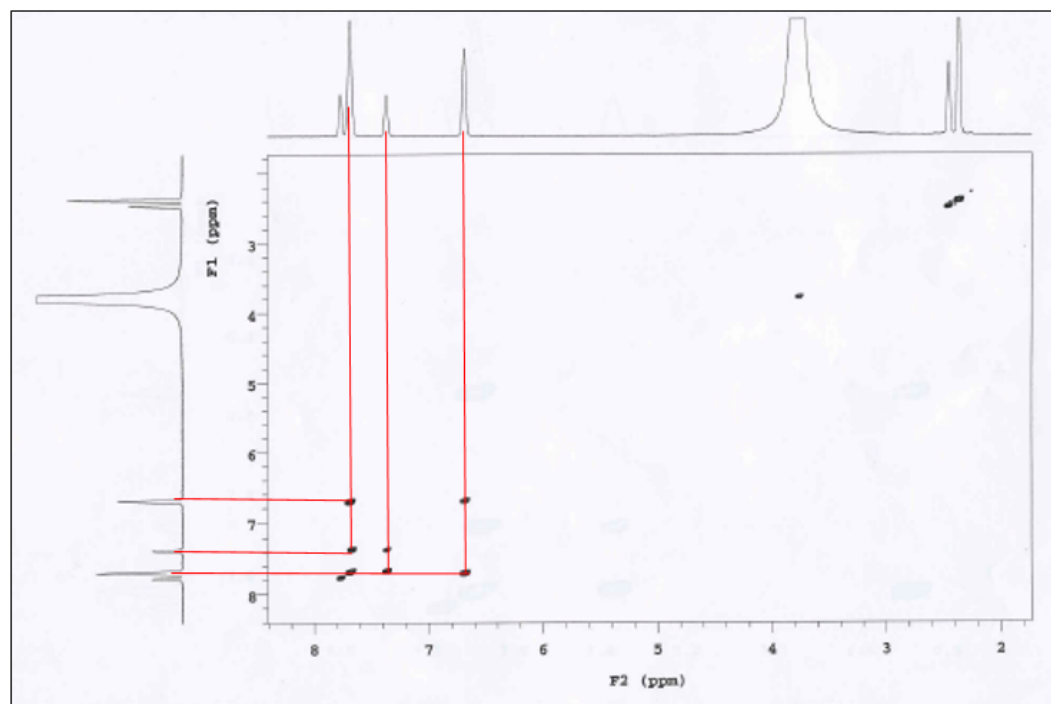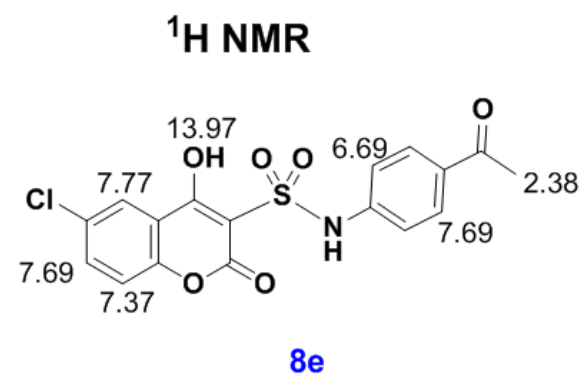

**Figure S13:**  $^1\text{H}$ - $^1\text{H}$ -Homomuclear COSY NMR spectrum of compound **8e** in DMSO- $d_6$  (600 MHz).

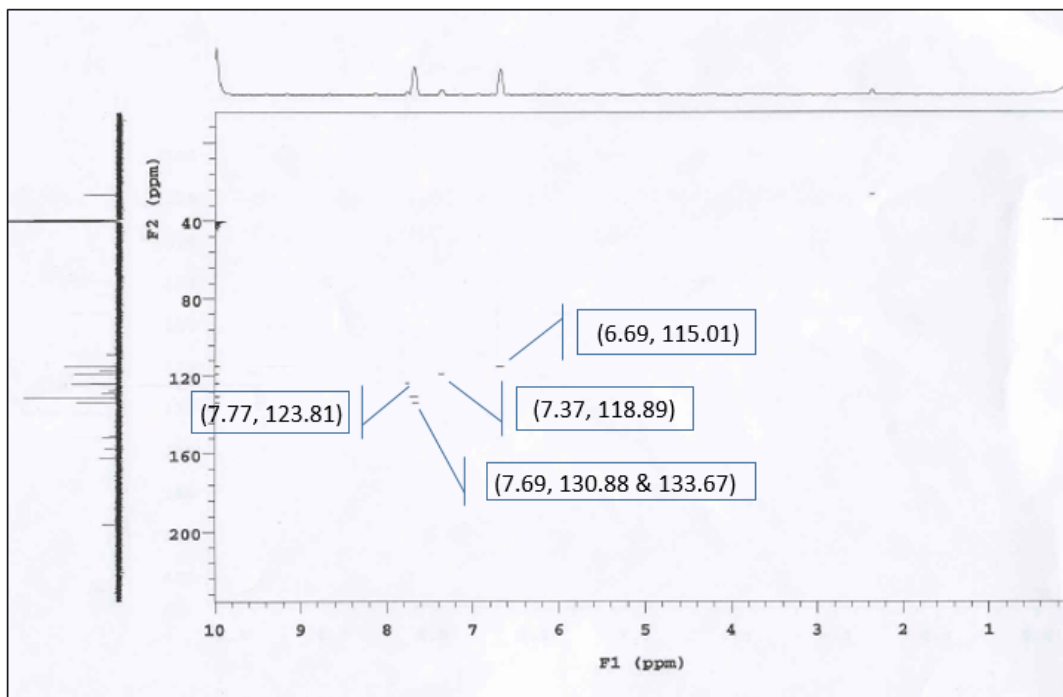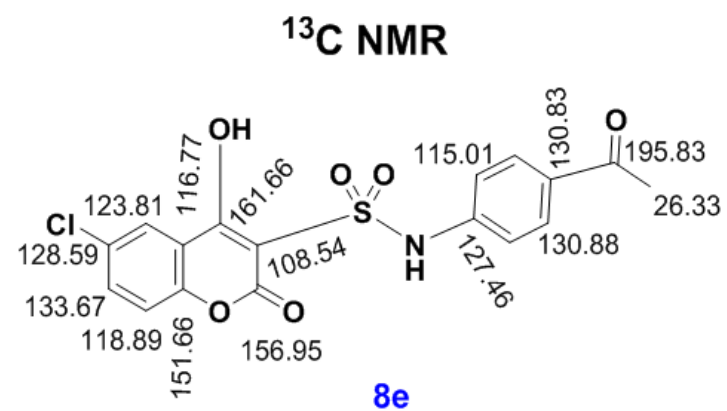

**Figure S14:**  $^1\text{H}$ - $^{13}\text{C}$ -Heteronuclear COSY NMR spectrum of compound **8e** in  $\text{DMSO-d}_6$  (600/154 MHz).



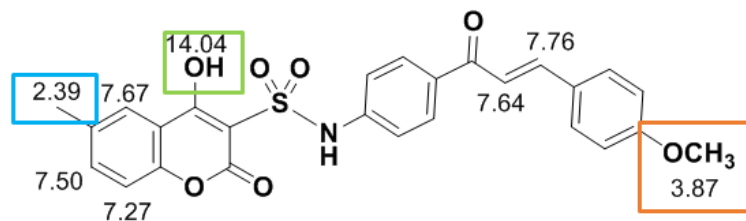

Ar-H:  
6.83, 7.01, 7.82, 8.00

**9f**

<sup>1</sup>H NMR

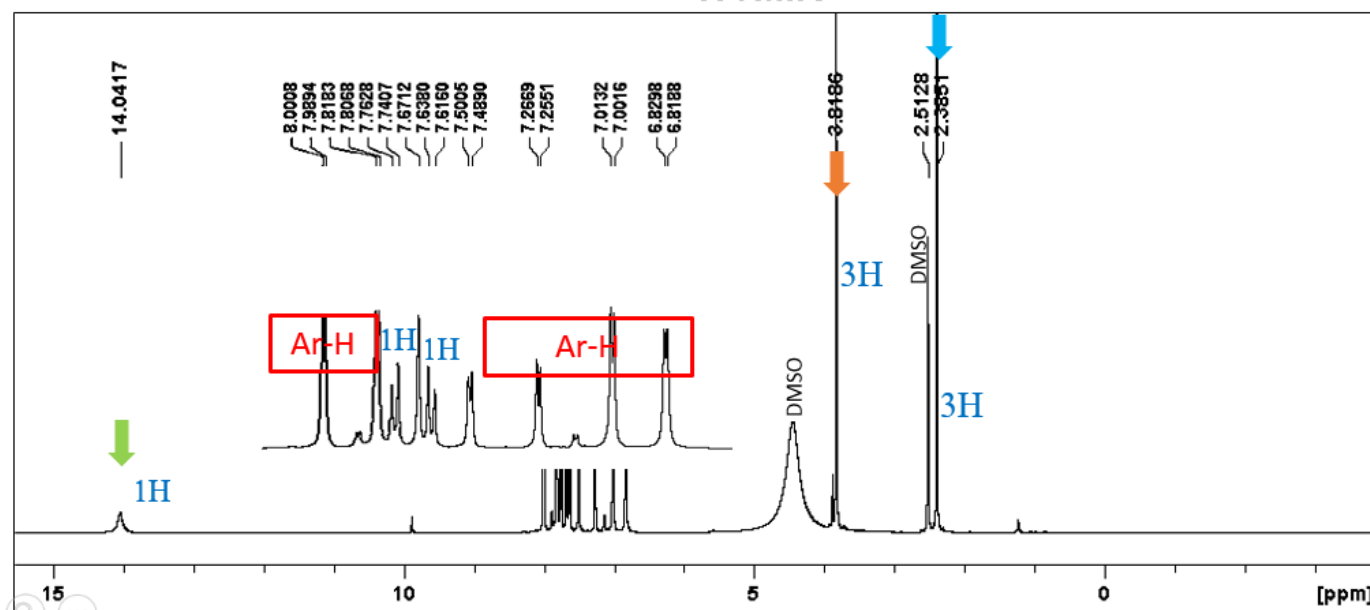

Figure S15: <sup>1</sup>H-NMR spectrum of compound **9f** in DMSO-d<sub>6</sub> (700 MHz).

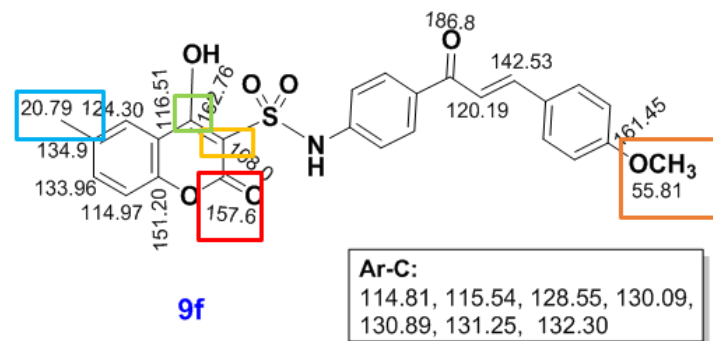

9f

$^{13}\text{C}$  NMR

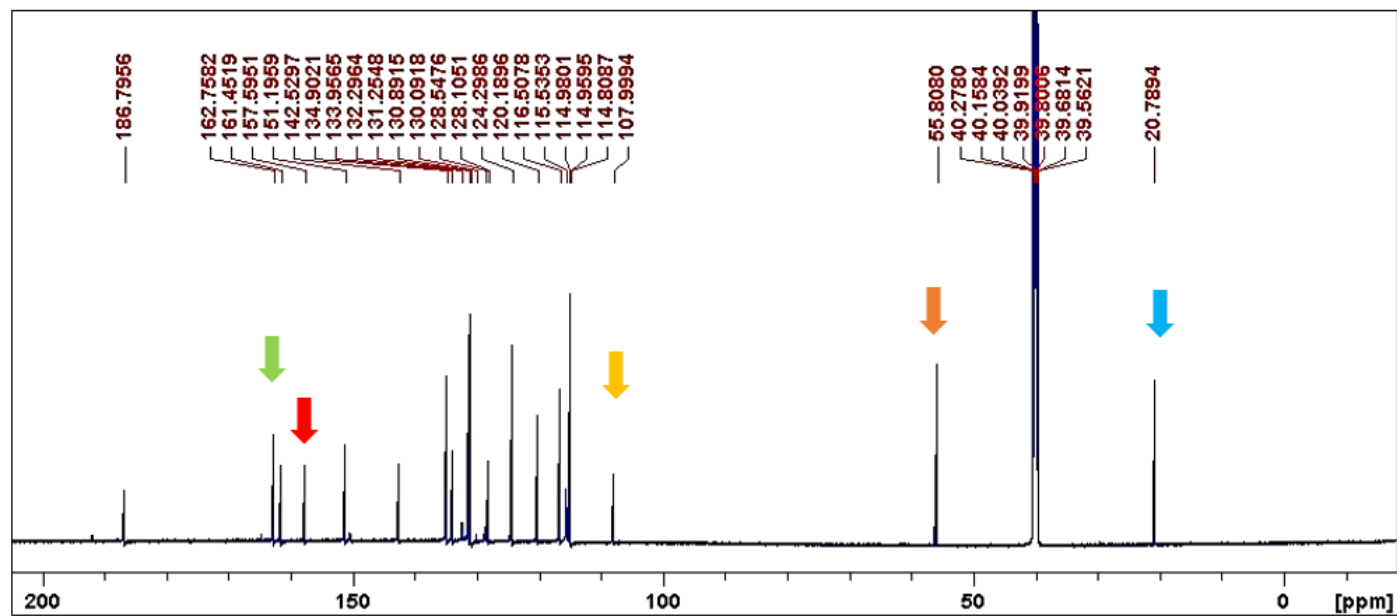

Figure S16:  $^{13}\text{C}$ -NMR spectrum of compound 9f in DMSO- $d_6$  (176 MHz).

**Table S1:** X-ray Crystallographic data of Compound **2a**: Bond precision: C-C = 0.0020 Å, Wavelength=0.71073, Cell: a=6.1640(4) b=20.1792(14) c=13.4613(9) °=90, °=95.956(2), °=90, Temperature: 123 K, Correction method= # Reported T Limits: Tmin=0.721 Tmax=0.746, AbsCorr = MULTI-SCAN, Data completeness= 1.000, Theta(max)= 29.998, R(reflections)= 0.0478( 3442), wR2(reflections)= 0.1142( 4853), S = 1.017, Npar= 262.

|                       | Calculated                                                    | Reported                                                      |
|-----------------------|---------------------------------------------------------------|---------------------------------------------------------------|
| <b>Volume</b>         | 1665.34(19)                                                   | 1665.34(19)                                                   |
| <b>Space group</b>    | P 21/n                                                        | P 21/n                                                        |
| <b>Hall group</b>     | -P 2yn                                                        | -P 2yn                                                        |
| <b>Moiety formula</b> | C <sub>20</sub> H <sub>13</sub> N <sub>3</sub> O <sub>5</sub> | C <sub>20</sub> H <sub>13</sub> N <sub>3</sub> O <sub>5</sub> |
| <b>Sum formula</b>    | C <sub>20</sub> H <sub>13</sub> N <sub>3</sub> O <sub>5</sub> | C <sub>20</sub> H <sub>13</sub> N <sub>3</sub> O <sub>5</sub> |
| <b>Mr</b>             | 375.33                                                        | 375.33                                                        |
| <b>Dx,g cm-3</b>      | 1.497                                                         | 1.497                                                         |
| <b>Z</b>              | 4                                                             | 4                                                             |
| <b>Mu (mm-1)</b>      | 0.110                                                         | 0.110                                                         |
| <b>F000</b>           | 776.0                                                         | 776.0                                                         |
| <b>F000'</b>          | 776.41                                                        |                                                               |
| <b>h,k,lmax</b>       | 8,28,18                                                       | 8,28,18                                                       |
| <b>Nref</b>           | 4855                                                          | 4853                                                          |
| <b>Tmin,Tmax</b>      | 0.991,0.995                                                   | 0.721,0.746                                                   |
| <b>Tmin'</b>          | 0.970                                                         |                                                               |
